# Supplementary material for: Understanding the role of K in the significantly improved hydrogen storage properties of a KOH-doped Li–Mg–N–H system
Source: Royal Society of Chemistry journal article supplement (doi:10.1039/c3ta01071f), 2013-01-01
Supplement: c3ta01071f.pdf [file c3ta01071f.pdf]

## Electronic Supplementary Information

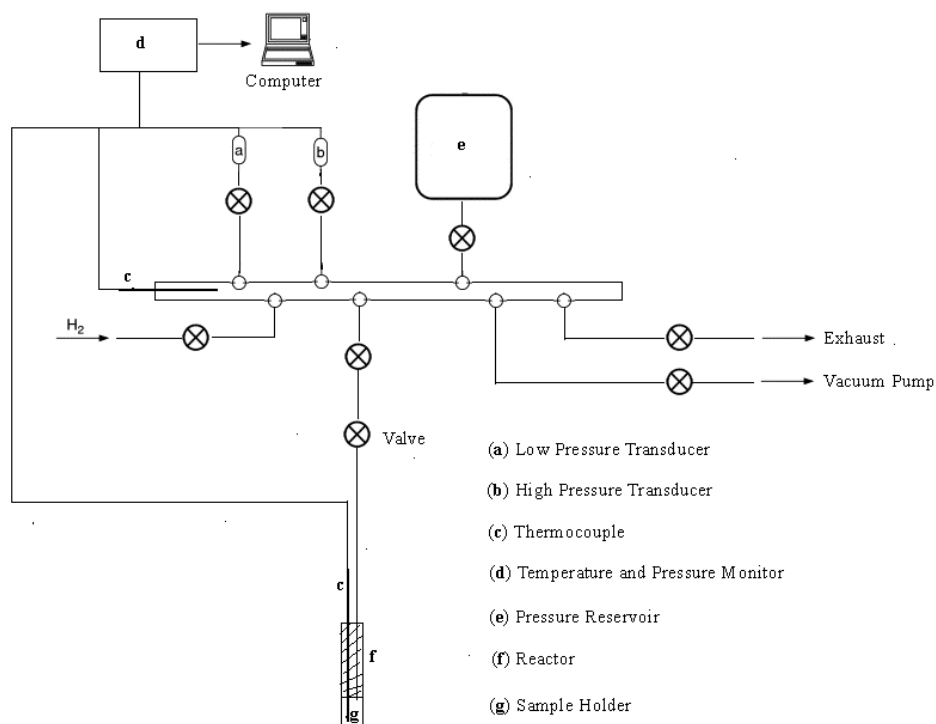

Fig. S1 Scheme of the homemade volumetric Sieverts-type apparatus.

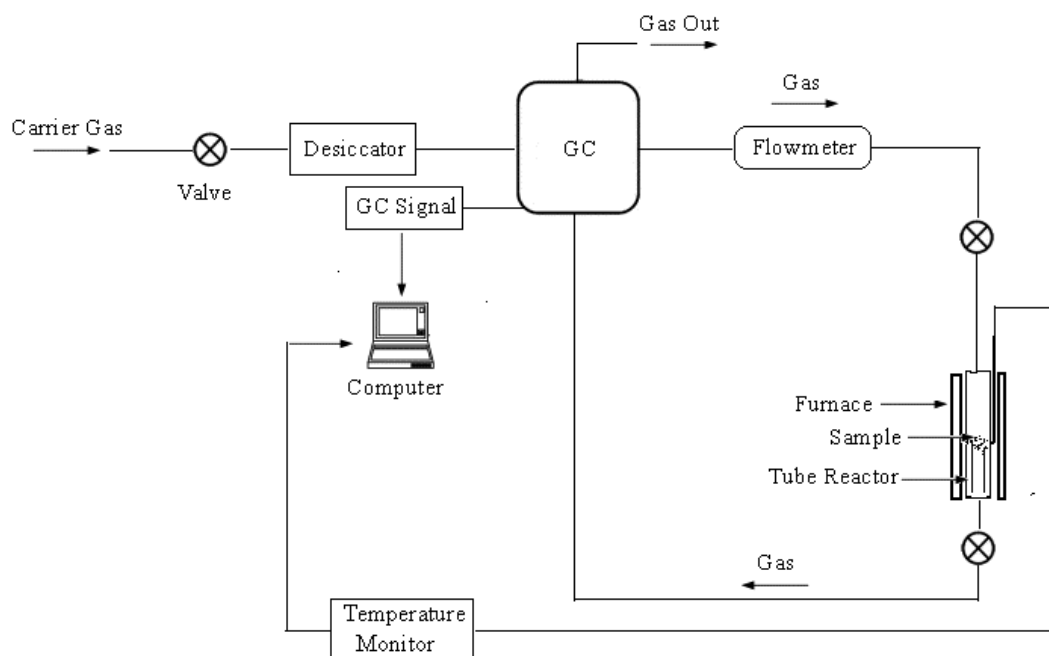

Fig. S2 Scheme of the homemade TPD apparatus.

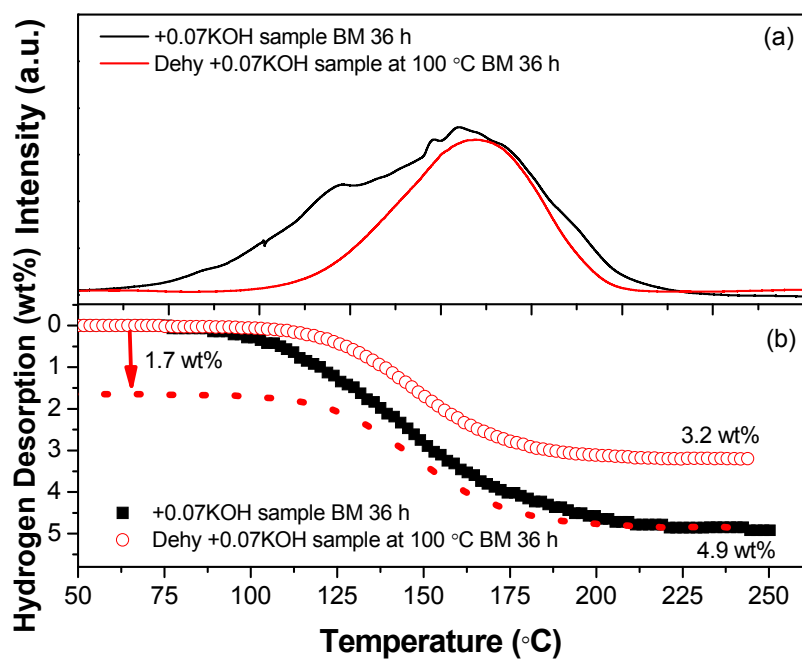

**Fig. S3** TPD (a) and volumetric dehydrogenation (b) curves of the  $\text{Mg}(\text{NH}_2)_2\text{-}2\text{LiH-}0.07\text{KOH}$  system with different treatments.

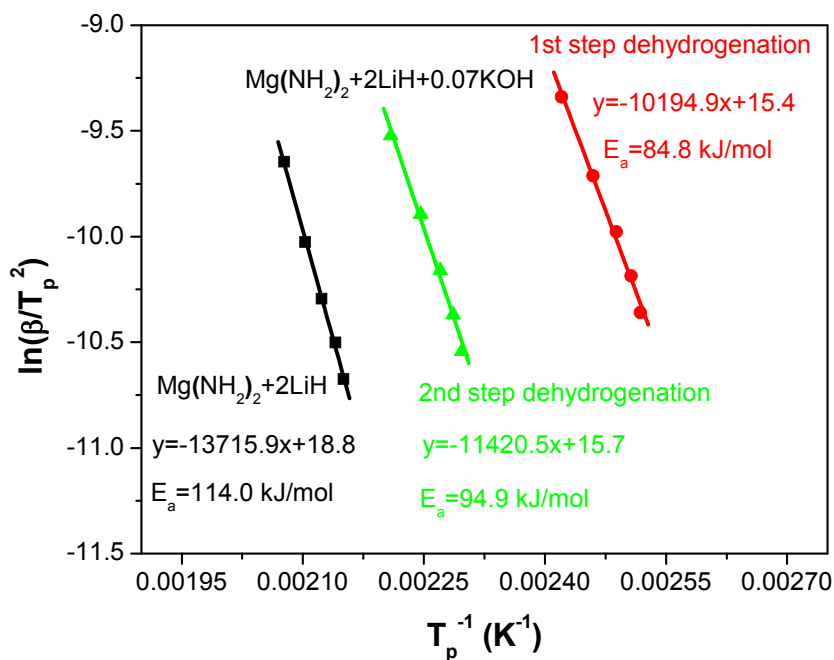

**Fig. S4** Kissinger plots of the  $\text{Mg}(\text{NH}_2)_2\text{-}2\text{LiH-}x\text{KOH}$  systems milled for 36 h.

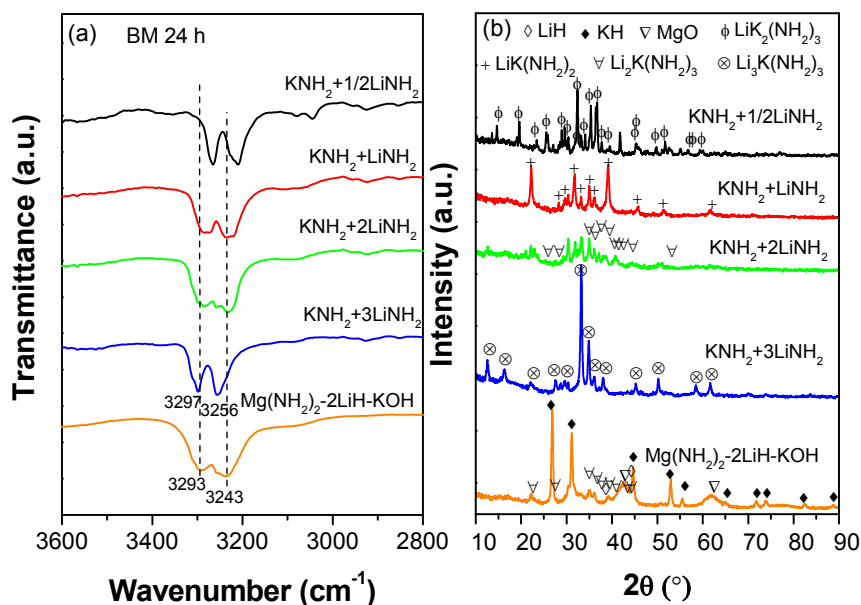

**Fig. S5** FTIR spectra (a) and XRD patterns (b) of the  $\text{KNH}_2\text{-}x\text{LiNH}_2$  ( $x=0.5, 1.0, 2.0$  and  $3.0$ ) mixtures after 24 h of ball milling under ammonia atmosphere.

**Table S1** FTIR peak positions for amides and imides.

| Samples                                          | Position ( $\text{cm}^{-1}$ )            | References |
|--------------------------------------------------|------------------------------------------|------------|
| $\text{Mg}(\text{NH}_2)_2$                       | 3327, 3274, 1572                         | [1]        |
|                                                  | 3326, 3271                               | [2]        |
| $\text{LiNH}_2$                                  | 3313, 3259, 1568.2, 1563, 1559.6, 1539.3 | [3]        |
|                                                  | 3312, 3258                               | [4]        |
| $\text{Li}_2\text{NH}$                           | 3160                                     | [5]        |
| Crystallized $\text{MgNH}$                       | 3251, 3240, 3197, 1560                   | [1]        |
| Amorphous $\text{MgNH}$                          | 3195                                     | [2]        |
| $\text{Li}_2\text{Mg}_2\text{N}_3\text{H}_3$     | 3196, 3164                               | [6]        |
| Cubic $\text{Li}_2\text{MgN}_2\text{H}_2$        | 3174                                     | [7]        |
| Orthorhombic $\text{Li}_2\text{MgN}_2\text{H}_2$ | 3183, 3164                               | [8]        |

[1] G. Linde and R. Juza, *Z. Anorg. Allg. Chem.*, 1974, **409**, 199.

[2] J. J. Hu, Z. T. Xiong, G. T. Wu, P. Chen, K. Murata and K. Sakata, *J. Power Sources*, 2006, **159**, 120.

- [3] J. P. O. Bohger, R. R. Essmann and H. Jacobs, *J. Mol. Struct.*, 1995, **348**, 325.
- [4] J. J. Hu, Y. F. Liu, G. T. Wu, Z. T. Xiong, Y. S. Chua and P. Chen, *Chem. Mater.*, 2008, **20**, 4398.
- [5] P. Chen, Z. Xiong, J. Luo, J. Lin and K. L. Tan, *J. Phys. Chem. B*, 2003, **107**, 10967.
- [6] J. J. Hu, Y. F. Liu, G. T. Wu, Z. T. Xiong and P. Chen, *J. Phys. Chem. C*, 2007, **111**, 18439.
- [7] J. H. Wang, J. J. Hu, Y. F. Liu, Z. T. Xiong, G. T. Wu, H. G. Pan and P. Chen, *J. Mater. Chem.*, 2009, **19**, 2141.
- [8] T. Markmaitree and L. L. Shaw, *J. Power Sources*, 2010, **195**, 1984.
